# Supplementary material
Source: Springer Nature journal article supplement (https://www.springermedizin.de/resource/supplementary/12963_2011_151_MOESM9_ESM.pdf/9572764)
Supplement: MOESM9 [file 9572764]

|         | Cause 1 | Cause 2 | Cause 3 |
|---------|---------|---------|---------|
| Train A | 10      | 9       | 25      |
| Train B | 11      | 3       | 19      |
| Train C | 14      | 5       | 5       |
| Train D | 4       | 12      | 13      |
| Train E | 3       | 2       | 18      |
| Train F | 7       | 13      | 6       |

**Train Score Matrix**

|        | Cause 1 | Cause 2 | Cause 3 |
|--------|---------|---------|---------|
| Test A | 10      | 10      | 20      |
| Test B | 5       | 16      | 18      |
| Test C | 13      | 10      | 14      |
| Test D | 12      | 9       | 13      |

**Test Score Matrix**

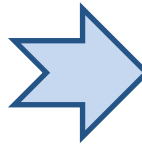

|        | Cause 1 | Cause 2 | Cause 3 |
|--------|---------|---------|---------|
| Test A | 4       | 3       | 2       |
| Test B | 5       | 1       | 4       |
| Test C | 2       | 3       | 4       |
| Test D | 2       | 4       | 5       |

**Test Rank Matrix**
